# Supplementary material for: Ribosome profiling reveals features of normal and disease-associated mitochondrial translation
Source: PubMed Central journal article supplement — Nat Commun. 2013 Dec 3;4:2886. doi: 10.1038/ncomms3886 (PMC3863897; doi:10.1038/ncomms3886), 2013-12-03
Supplement: ncomms3886-s1.pdf [file ncomms3886-s1.pdf]

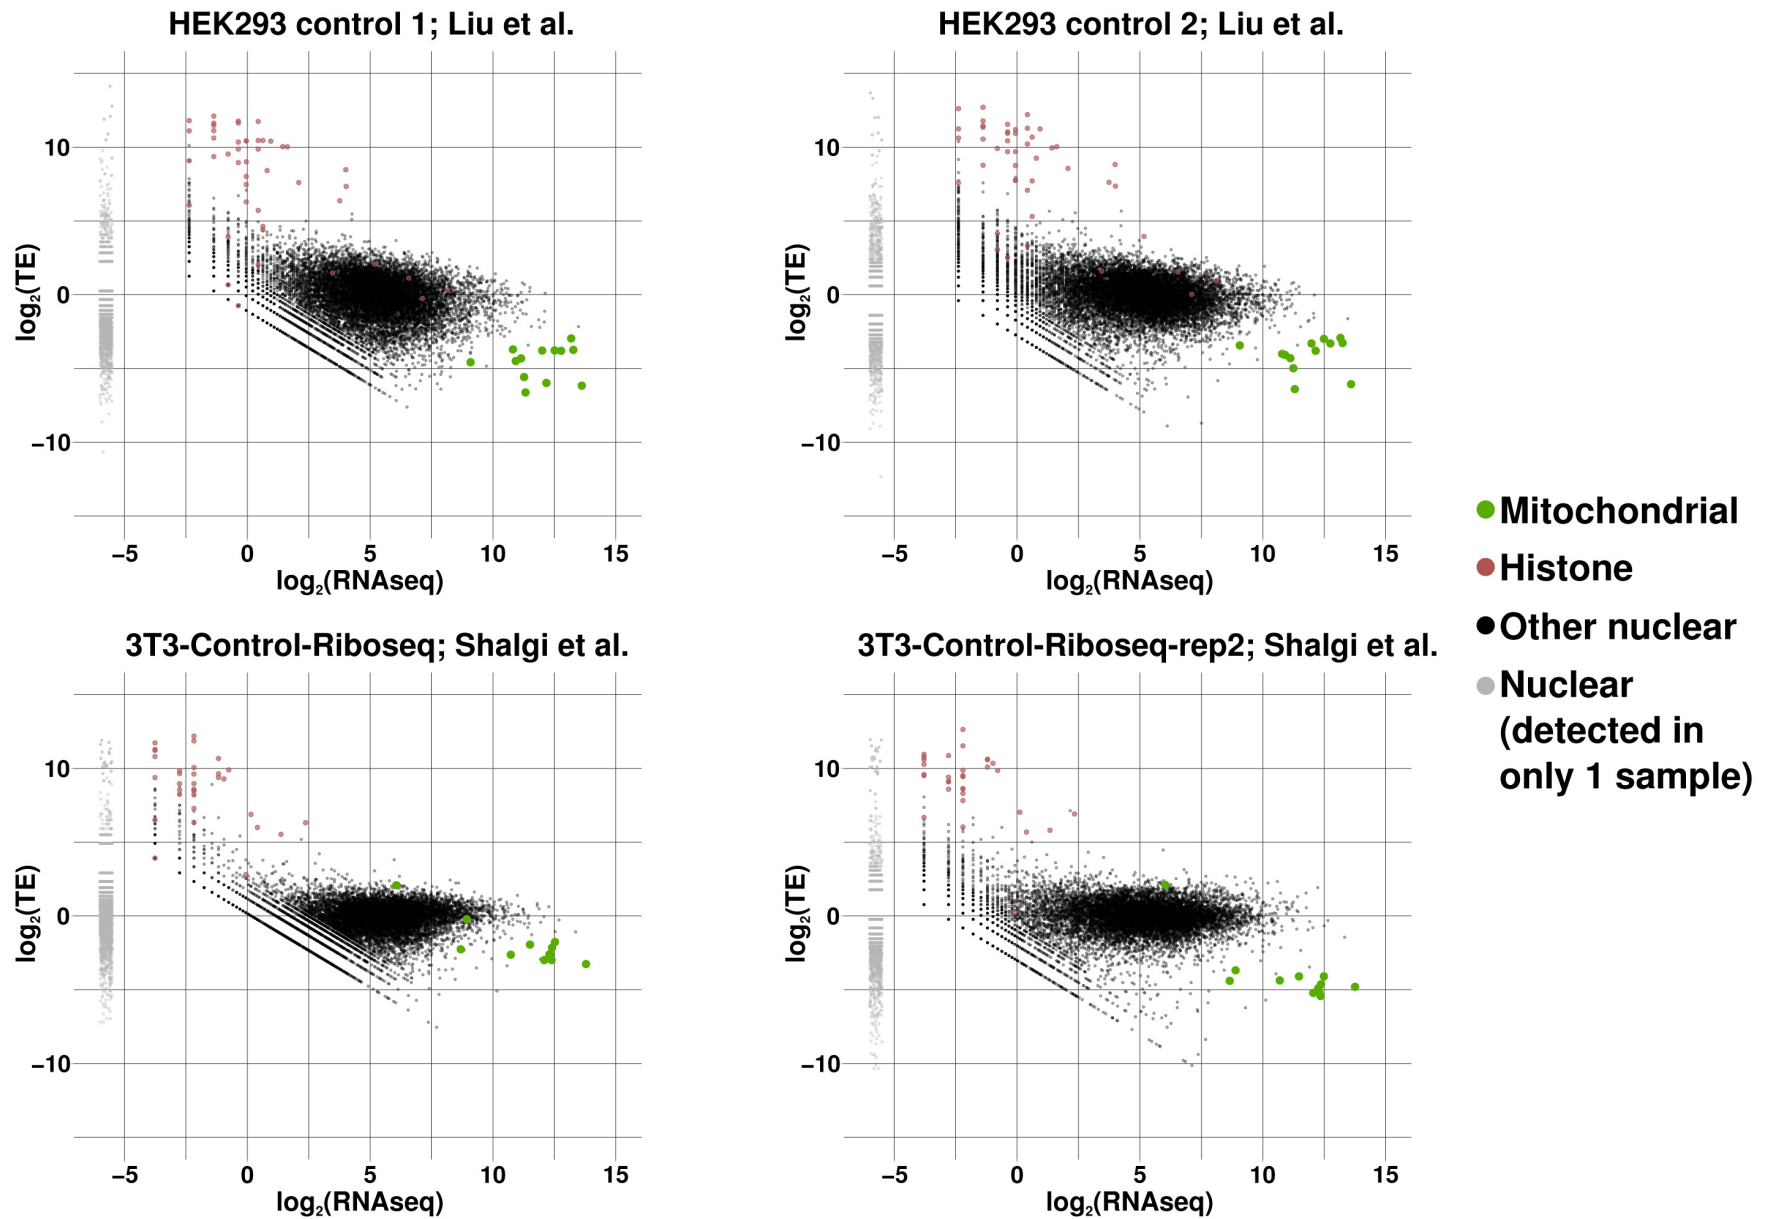

**Supplementary Figure S1: Translational efficiency (TE) versus abundance (measured by RNAseq) in two recently published datasets from Liu et al.<sup>10</sup> and Shalgi et al.<sup>11</sup>.**

Since the data from Liu et al. was supplied without matching RNAseq of the samples, we used RNA sequencing data from matching cell line and control condition from Xiao et al.<sup>20</sup>. GEO sample identifiers of the used data are given in Supplementary Table S1. For the data from Liu et al. the same pipeline was used as the data described in the article. For the data from Shalgi et al. an adapted version of the protocol was used using the *Mus Musculus* NCBI37 reference sequence for alignment and Ensembl v67 annotations for analysis.

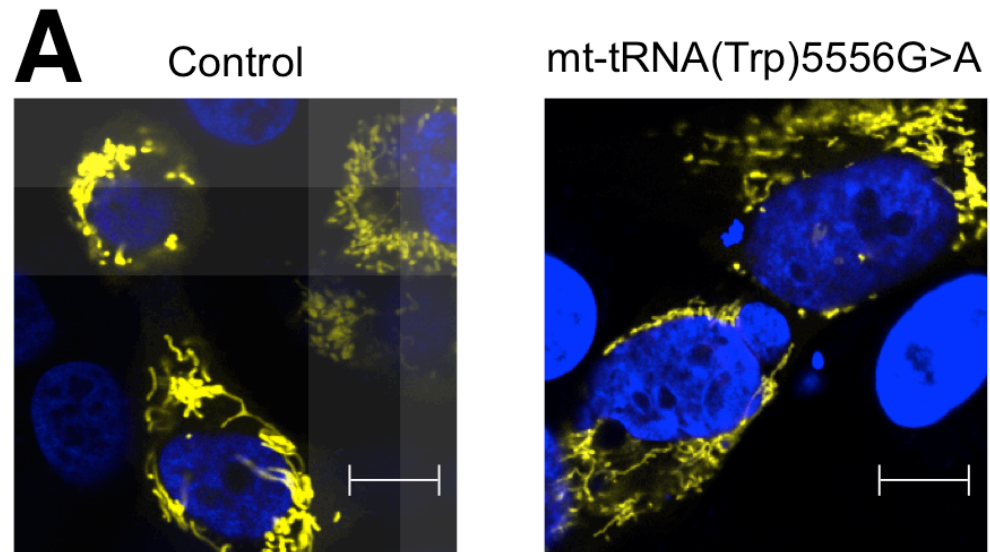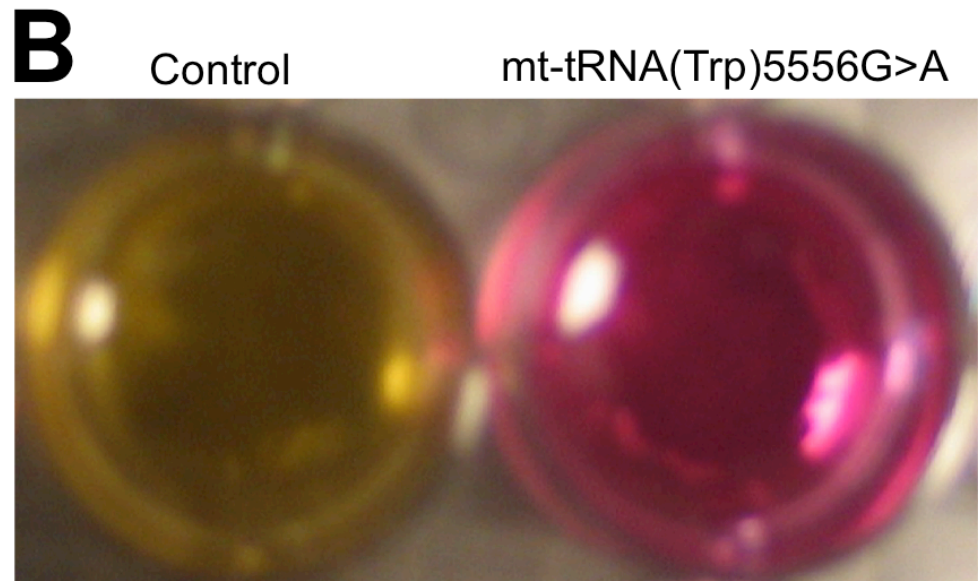

**Supplementary Figure S2: Impact of tRNA(Trp)<sup>5556G>A</sup> on phenotype.**  
 A. Immunofluorescence microscopy of Cybrids with wt and tRNA(Trp)<sup>5556G>A</sup> mutated mitochondria transfected with a mitochondria-targeted YFP vector. The scales measure 6.45 and 7.81 micrometer respectively. B. Image of wells containing control and tRNA(Trp)<sup>5556G>A</sup> mutant cells.

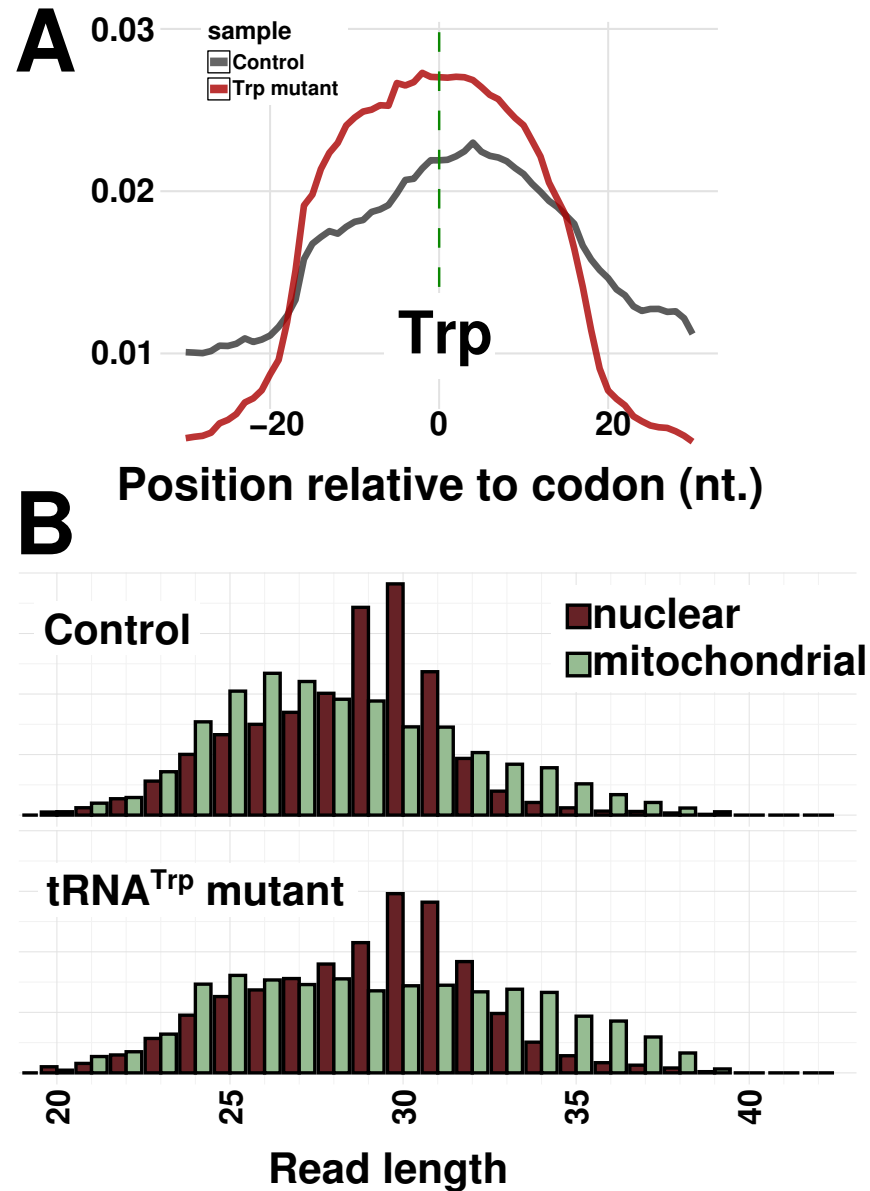

**Supplementary Figure S3**

Analysis of RP-sequencing data on an independent biological replicate pair of control and tRNA(Trp)<sup>5556G>A</sup> mutant cybrids. A. Normalized RPF density plot at tryptophan codon regions in the control and tRNA(Trp)<sup>5556G>A</sup> mutant sample, analogous to Fig. 3E. B. RPF length analysis analogous to Fig. 4D.

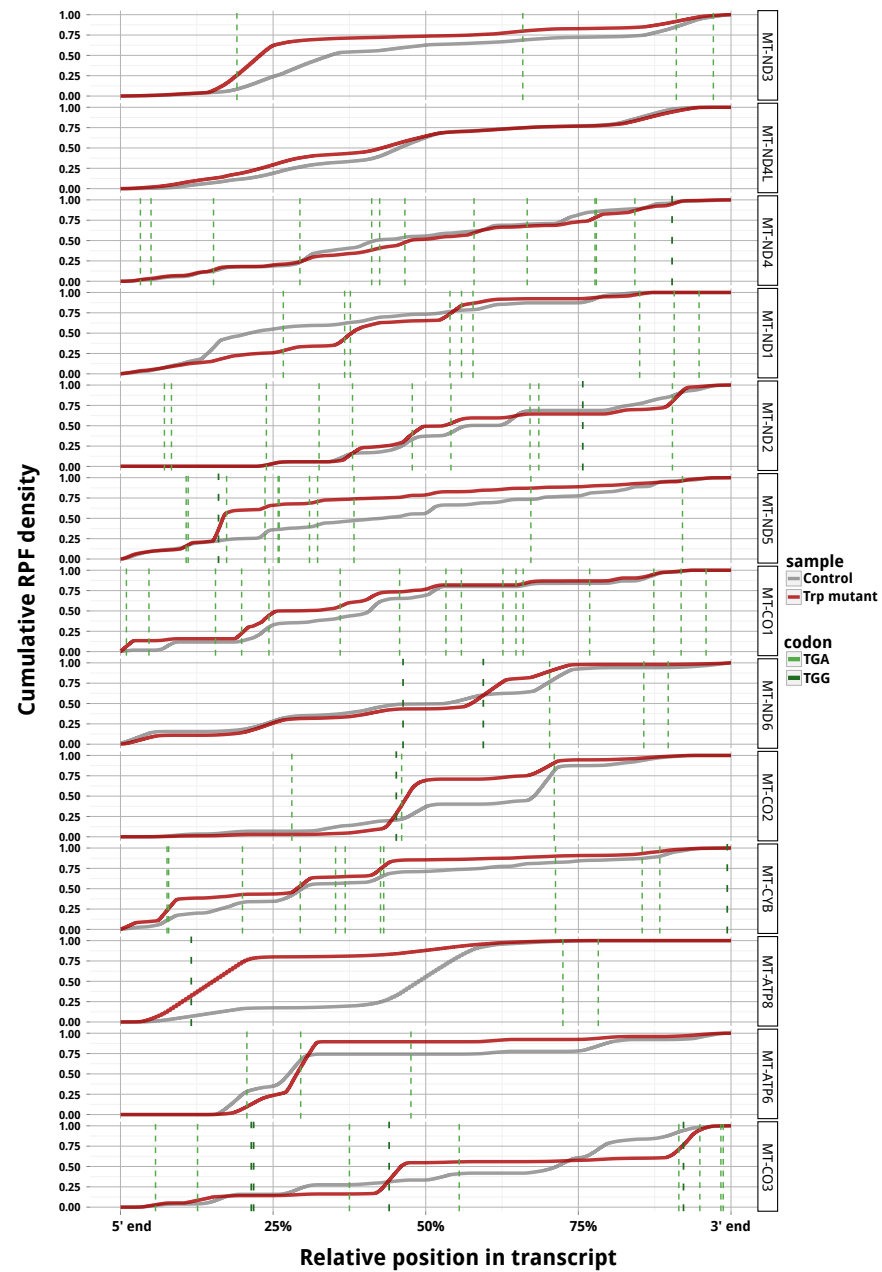

**Supplementary Figure S4**

Cumulative density plots for all 13 mitochondrial protein-coding genes in the wild-type (gray line) and tRNA(Trp)<sup>S556G>A</sup> mutant cybrid (red line) samples. Dashed lines indicate the positions of TGA (light green) and TGG (dark green) codons.

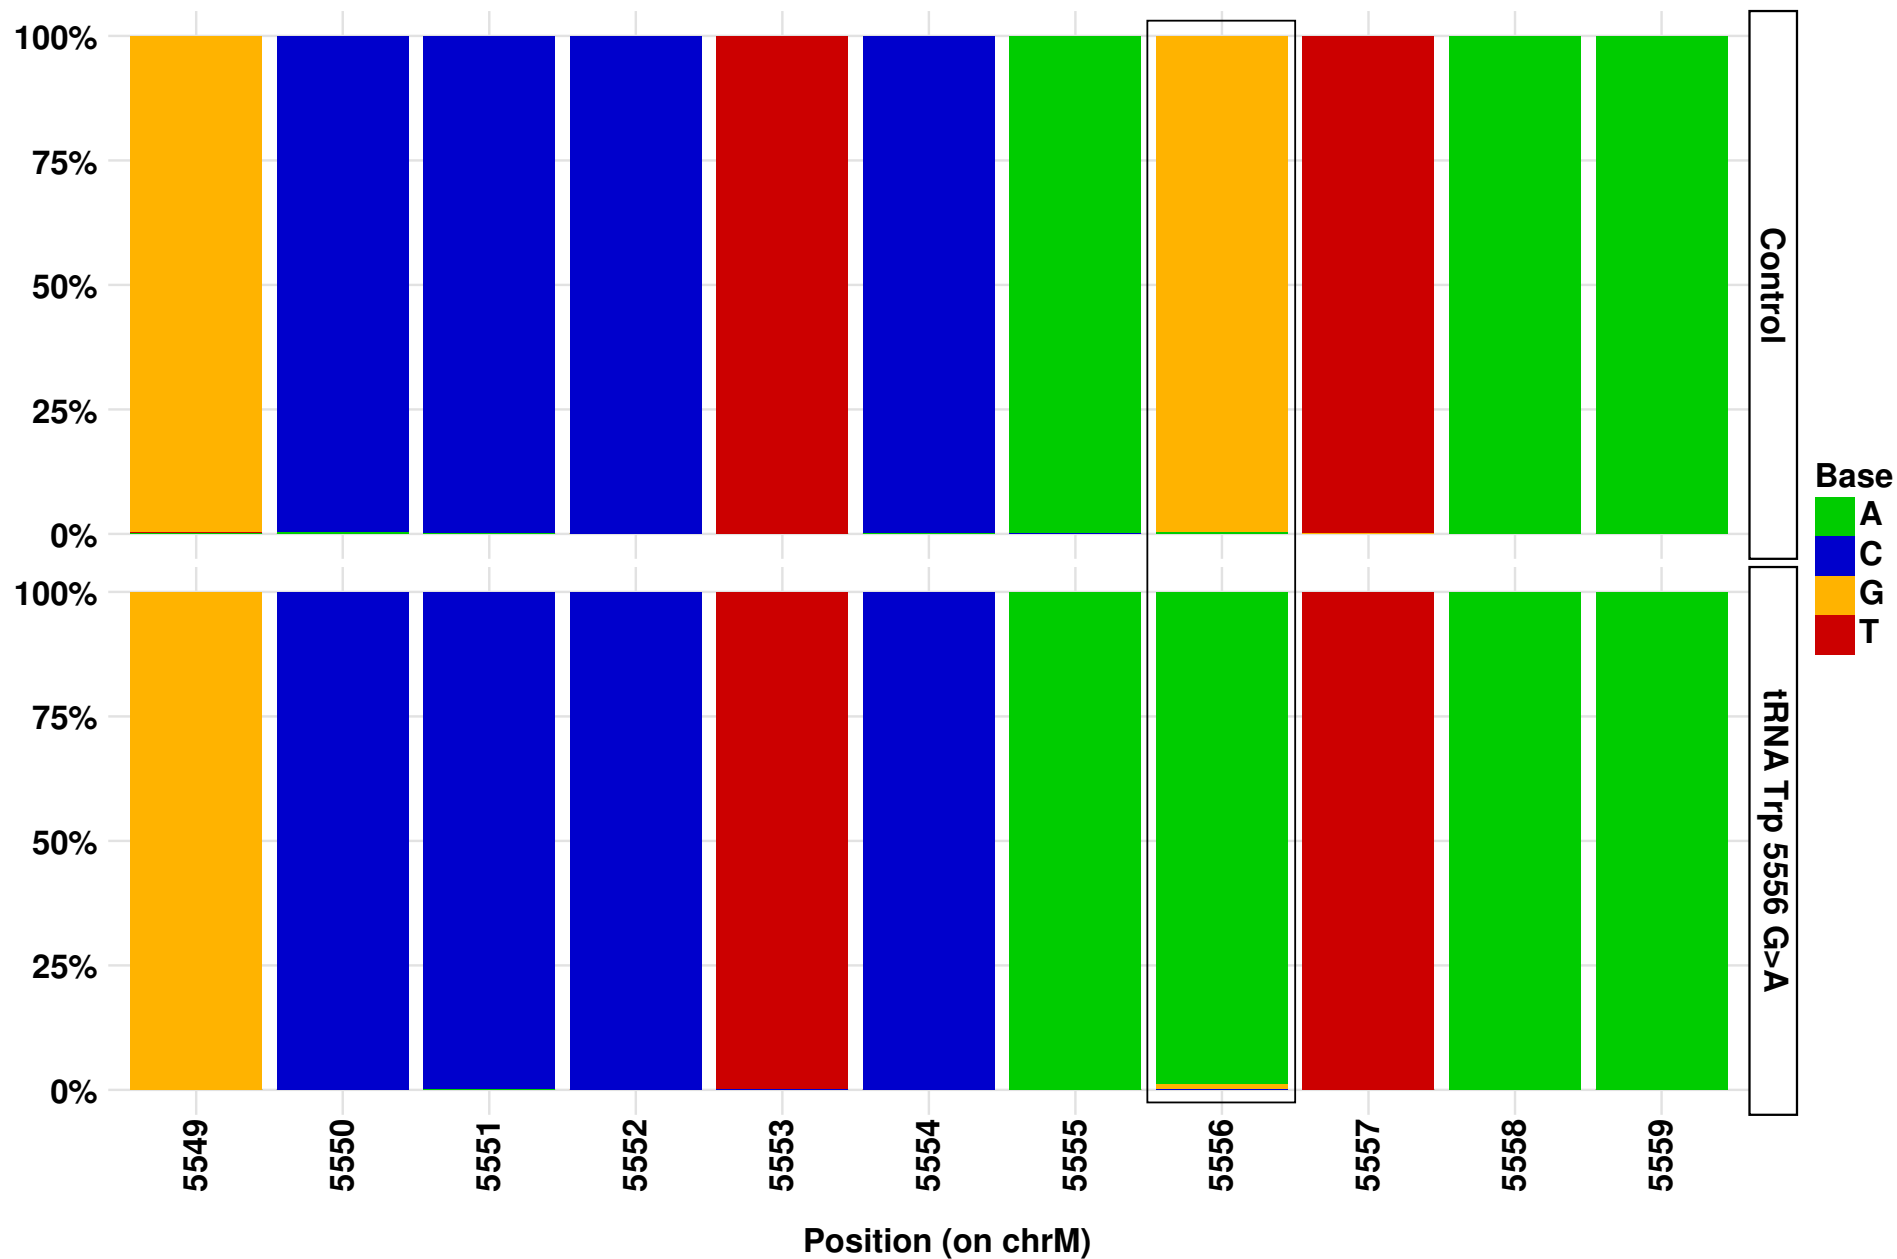

**Supplementary Figure S5**

Genotyping of the control and mutant cells based on reads covering the mitochondrial tRNA-Trp gene mutation. Y-axis shows the fraction of occurrence of each nucleotide for the positions 5549-5559.

**A**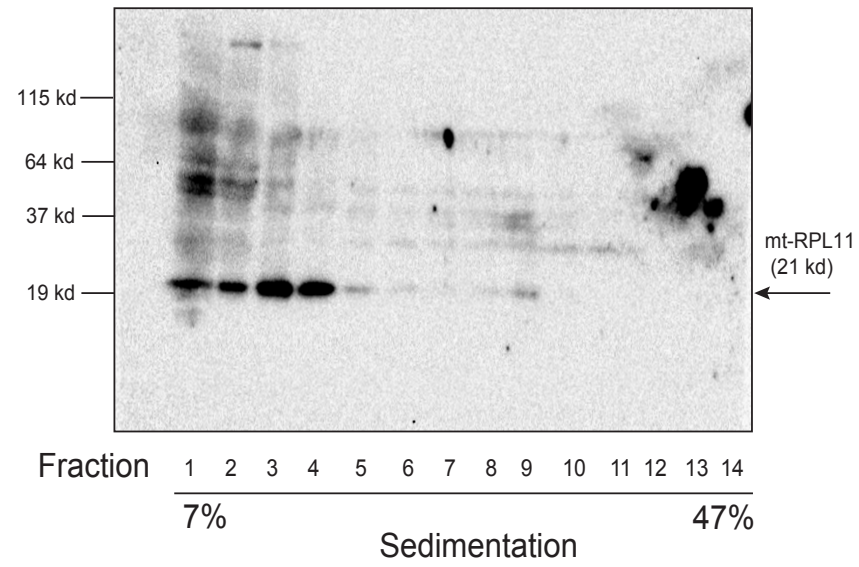**B**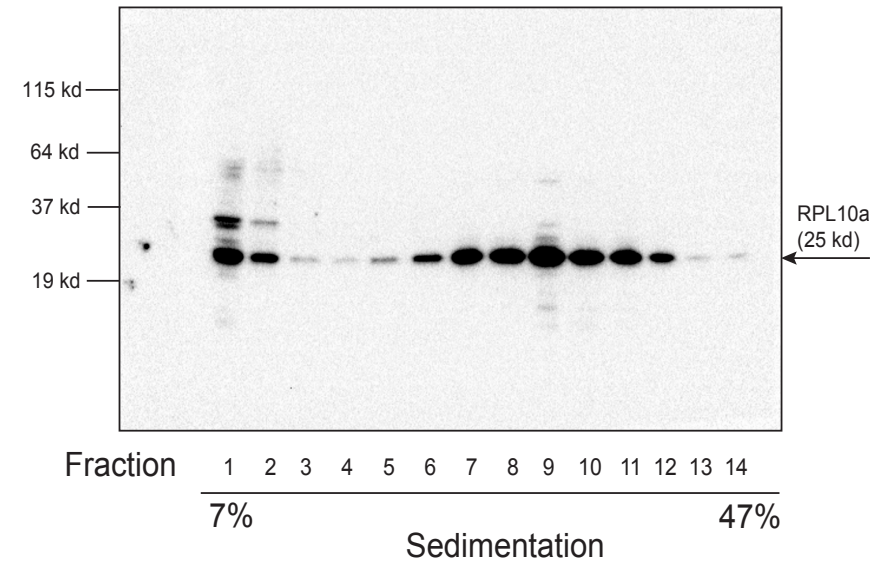**C**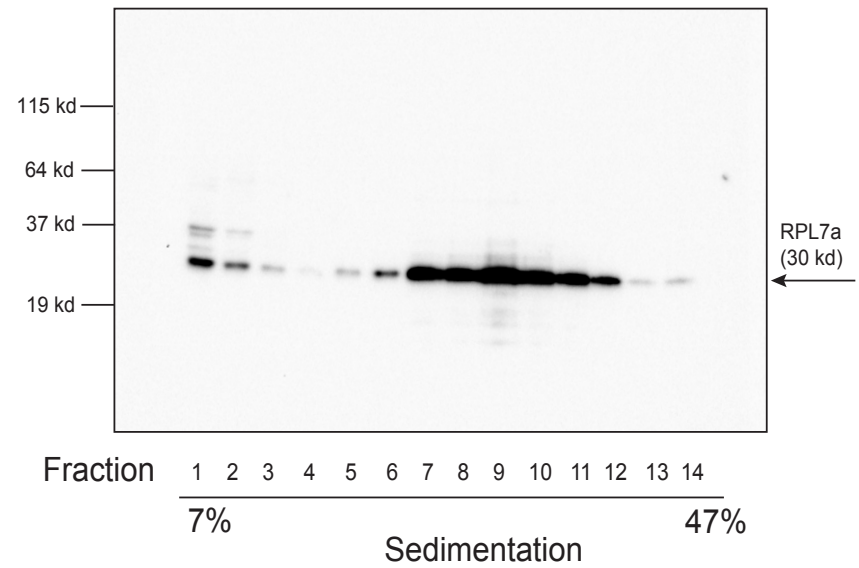**D**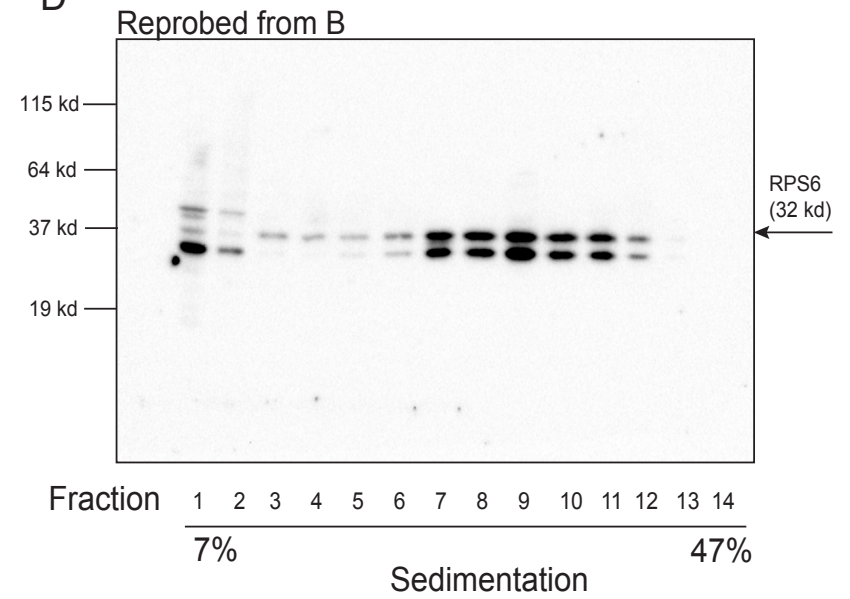

**Supplementary Figure S6**  
Full western blots from figure 1B.

Table S1 -- used datasets

|               | sample            | SRR ID    | GSM ID   |
|---------------|-------------------|-----------|----------|
| Liu et al.    | HEK293_CGRR619082 |           | (NA)     |
|               | HEK293_CGRR619083 |           | (NA)     |
| Xiao et al.   | Control-KD        | SRR029285 | SM417716 |
| Shalgi et al. | 3T3-Contro        | SRR649749 | SM794848 |
|               | 3T3-Contro        | SRR649752 | SM794854 |
|               | 3T3-Contro        | SRR649755 | SM794857 |

Legend

Ribosome profiling sample

RNA sequencing sample

**Supplementary Table S1:** Overview of recently published datasets used to create Supplementary Fig. S1.

**Supplementary Table S1:** Overview of recently published datasets used to create Supplementary Fig. S1.
